# Supplementary material for: Comparison of central laboratory HbA1c measurements obtained from a capillary collection versus a standard venous whole blood collection in the GRADE and EDIC studies
Source: PubMed Central journal article supplement (PMC8592405; doi:10.1371/journal.pone.0257154), 2021-11-15
Supplement: pone.0257154.s001.pdf [file pone.0257154.s001.pdf]

# S1 Table. Capillary and Venous Sample Data

March 29, 2021

| Capillary HbA1c (%) | Venous HbA1c (%) | Study |
|---------------------|------------------|-------|
| 8.4                 | 8.6              | EDIC  |
| 9.2                 | 9.3              | EDIC  |
| 8.1                 | 8.2              | EDIC  |
| 8.3                 | 8.4              | EDIC  |
| 9.1                 | 8.8              | EDIC  |
| 7.7                 | 7.7              | EDIC  |
| 7.8                 | 7.8              | EDIC  |
| 9.7                 | 9.5              | EDIC  |
| 8.2                 | 8.1              | EDIC  |
| 7.8                 | 7.7              | EDIC  |
| 11                  | 11.2             | EDIC  |
| 7.8                 | 7.9              | EDIC  |
| 9.4                 | 9.4              | EDIC  |
| 9.3                 | 9.3              | EDIC  |
| 7.9                 | 8.1              | EDIC  |
| 9.5                 | 9.7              | EDIC  |
| 10.5                | 10.7             | EDIC  |
| 8                   | 7.9              | EDIC  |
| 9.1                 | 9.1              | EDIC  |
| 7.2                 | 7.2              | EDIC  |
| 7.8                 | 7.8              | EDIC  |
| 8.9                 | 8.9              | EDIC  |
| 9.2                 | 9.2              | EDIC  |
| 7.9                 | 7.8              | EDIC  |
| 8.1                 | 8                | EDIC  |
| 8.6                 | 8.5              | EDIC  |
| 8.3                 | 8.5              | EDIC  |
| 8.7                 | 8.8              | EDIC  |
| 7.4                 | 7.4              | EDIC  |
| 9.1                 | 8.9              | EDIC  |
| 10.9                | 10.9             | EDIC  |
| 10                  | 10.2             | EDIC  |
| 9.7                 | 9.6              | EDIC  |
| 7.5                 | 7.5              | EDIC  |

| Capillary HbA1c (%) | Venous HbA1c (%) | Study |
|---------------------|------------------|-------|
| 8.9                 | 8.9              | EDIC  |
| 8.1                 | 8.2              | EDIC  |
| 8.8                 | 9                | EDIC  |
| 8.8                 | 8.8              | EDIC  |
| 7.7                 | 7.8              | EDIC  |
| 9.5                 | 9.5              | EDIC  |
| 9.8                 | 9.7              | EDIC  |
| 8.1                 | 8.2              | EDIC  |
| 8.6                 | 8.4              | EDIC  |
| 7.4                 | 7.6              | EDIC  |
| 4.2                 | 8.1              | EDIC  |
| 8.1                 | 8.3              | EDIC  |
| 8.8                 | 8.9              | EDIC  |
| 10.3                | 10.4             | EDIC  |
| 7.2                 | 7.3              | EDIC  |
| 8.1                 | 8.2              | EDIC  |
| 9.4                 | 9.5              | EDIC  |
| 10.5                | 10.5             | EDIC  |
| 8.8                 | 8.9              | EDIC  |
| 8.4                 | 8.4              | EDIC  |
| 8.9                 | 8.9              | EDIC  |
| 8.2                 | 8.4              | EDIC  |
| 8.5                 | 8.3              | EDIC  |
| 8.5                 | 8.4              | EDIC  |

| Capillary HbA1c (%) | Venous HbA1c (%) | Study |
|---------------------|------------------|-------|
| 6.7                 | 6.6              | GRADE |
| 6.1                 | 6                | GRADE |
| 7.8                 | 7.9              | GRADE |
| 7.1                 | 7.3              | GRADE |
| 7.6                 | 7.7              | GRADE |
| 6.4                 | 6.4              | GRADE |
| 7.1                 | 7.1              | GRADE |
| 8.3                 | 8.3              | GRADE |
| 6.2                 | 6.2              | GRADE |
| 6.1                 | 6.1              | GRADE |
| 6.3                 | 6.4              | GRADE |
| 7.6                 | 7.7              | GRADE |
| 6.8                 | 6.8              | GRADE |
| 7.7                 | 7.7              | GRADE |
| 6.5                 | 6.5              | GRADE |
| 6.5                 | 6.5              | GRADE |
| 7.2                 | 6.9              | GRADE |
| 6.4                 | 6.7              | GRADE |
| 10.8                | 10.7             | GRADE |
| 6.4                 | 6.5              | GRADE |
| 6.3                 | 6.5              | GRADE |
| 7.2                 | 7.3              | GRADE |
| 6.8                 | 6.9              | GRADE |
| 6.8                 | 6.7              | GRADE |
| 6.2                 | 6.2              | GRADE |
| 8.5                 | 8.6              | GRADE |
| 6.4                 | 6.4              | GRADE |
| 6.3                 | 6.3              | GRADE |
| 6.2                 | 6.3              | GRADE |
| 5.9                 | 5.8              | GRADE |
| 6.9                 | 6.9              | GRADE |
| 5.3                 | 5.4              | GRADE |
| 6.6                 | 6.7              | GRADE |
| 10.1                | 10.1             | GRADE |

| Capillary HbA1c (%) | Venous HbA1c (%) | Study |
|---------------------|------------------|-------|
| 6.4                 | 6.4              | GRADE |
| 7.3                 | 7.4              | GRADE |
| 5.5                 | 5.6              | GRADE |
| 6.5                 | 6.4              | GRADE |
| 6.9                 | 6.8              | GRADE |
| 6.6                 | 6.7              | GRADE |
| 6.7                 | 6.6              | GRADE |
| 6.8                 | 6.6              | GRADE |
| 7.1                 | 7.2              | GRADE |
| 7.1                 | 7.1              | GRADE |
| 7.4                 | 7.4              | GRADE |
| 6.8                 | 6.9              | GRADE |
| 6.2                 | 6.3              | GRADE |
| 6.5                 | 6.6              | GRADE |
| 6.6                 | 6.5              | GRADE |
| 8.4                 | 8.2              | GRADE |
| 11.9                | 11.9             | GRADE |
| 7.4                 | 7.5              | GRADE |
| 10.1                | 9.9              | GRADE |
| 6.5                 | 6.5              | GRADE |
| 6.6                 | 6.6              | GRADE |
| 6.9                 | 7                | GRADE |
| 7.7                 | 7.7              | GRADE |
| 6.4                 | 6.4              | GRADE |
| 7.7                 | 7.7              | GRADE |
| 6.8                 | 6.9              | GRADE |
| 7                   | 7                | GRADE |
| 6.1                 | 6.2              | GRADE |
| 9                   | 9                | GRADE |
| 7.8                 | 7.7              | GRADE |
