# Supplementary material for: Comparison of central laboratory HbA1c measurements obtained from a capillary collection versus a standard venous whole blood collection in the GRADE and EDIC studies
Source: PubMed Central journal article supplement (PMC8592405; doi:10.1371/journal.pone.0257154), 2021-11-15

## **S3 Fig. Participant Video Instruction Postcard for Capillary Blood Collection**

### **HbA1c Collection Kit Video**

Follow the link below to watch a short video on how to use your HbA1c Collection Kit.

**<https://grade.bsc.gwu.edu/capkit>**

**Thank you so much for taking the time to do the sample collection.  
Your participation in GRADE is important to the study!**

*See reverse for important reminders mentioned in the video.*

## Some helpful tips for completing your collection:

- In case your shipment is lost or delayed, write the date you completed your collection here:

---

*(be sure to hold onto this notecard!)*

- When you open the blue-capped vial, be careful not to dump or spill out the liquid
- Once the tube is filled with blood, drop it into the blue-capped vial and close the lid, then shake the vial until the liquid has turned pink.
- Fill in the date you completed the collection on the form, and write in any comments you have.
- Don't write your name or return address anywhere on the form or mailer box.
- Mail your kit back within 2 days of collecting your sample. If it's really hot or cold outside, drop the kit off inside a post office.
- Reach out to your GRADE team if you aren't sure when to complete the collection, and feel free to contact them with any question you have:

---

---

*(Study Coordinator name and phone number)*

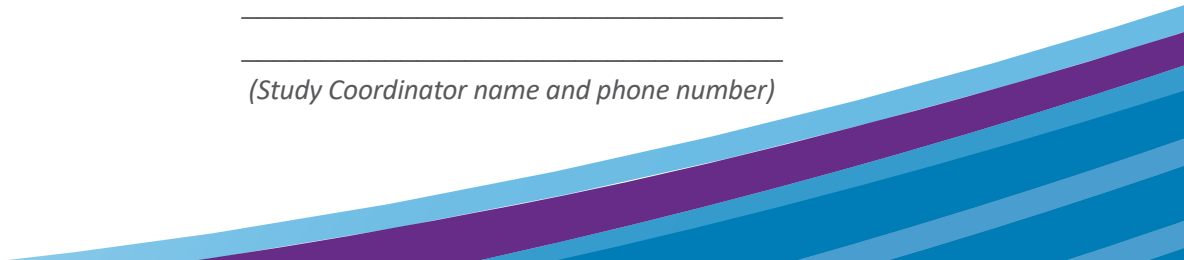

Supplement: pone.0257154.s004.pdf [file pone.0257154.s004.pdf]
